# Supplementary material for: Murderers or thieves at risk? Offence-related suicide rates in adolescent and adult prison populations
Source: PLoS One. 2019 Apr 3;14(4):e0214936. doi: 10.1371/journal.pone.0214936 (PMC6447226; doi:10.1371/journal.pone.0214936)
Supplement: S1 Appendix — Detailed information on life years spent in prison (Table A in S1 Appendix), suicides (Table B and Table C in S1 Appendix) and suicide rates (Table D in S1 Appendix). (XLSX) [file pone.0214936.s001.xlsx]

## Sheet: A prisoners
	Individuals in German Prisons				all prisoners			preventive detention			prisoners in adult and juvenile criminal custody
	Years 2000 - 2016				(preventive detention, criminal custody)
														age groups
					total	male	female	total	male	female	total	female	male	male	male	male	male	male
					all age groups	all age groups	all age groups	all age groups	all age groups	all age groups	all age groups	all age groups	all age groups	14-18	18-21	21-25	Sum 14-25 ("Adolesc")	25+ ("Adults")
																	("Adolesc")	("Adults")
	all offences				1018719	966616	52103	7051	7032	19	1011668	52084	959584	10802	52928	126040	189770	769814
	criminal law	StGB §§
		80-168, 331-357
		ohne 142		offences against the state	17359	16414	945	14	14	0	17345	945	16400	68	574	2132	2774	13626
		174-184b		offences against sexual self-determination	75744	75086	658	3801	3801	0	71943	658	71285	434	1939	4060	6433	64852
		185-189		insult	4411	4221	190	0	0	0	4411	190	4221	19	129	497	645	3576
		211-222		offences against life	74133	69703	4430	695	691	4	73438	4426	69012	314	1908	4824	7046	61966
		223-231		offences against physical integrety	114015	110461	3554	462	462	0	113553	3554	109999	1965	10978	21743	34686	75313
		234-241a		crimes against personal liberty	11749	11447	302	118	118	0	11631	302	11329	67	425	1261	1753	9576
		169-173, 201-206		crimes against the person	5015	4927	88	0	0	0	5015	88	4927	1	5	59	65	4862
		242-248c		theft and related offences	221558	207682	13876	248	247	1	221310	13875	207435	3291	14728	32462	50481	156954
		249-255, 316a		robbery and related offences	129575	126235	3340	1315	1306	9	128260	3331	124929	3890	14906	24798	43594	81335
		257-261		receiving	5884	5677	207	3	3	0	5881	207	5674	26	146	478	650	5024
		263-266b		fraud and related offences	103304	91812	11492	186	186	0	103118	11492	91626	154	1590	7551	9295	82331
		267-281		falsification of a document	21463	19524	1939	20	20	0	21443	1939	19504	51	592	2081	2724	16780
		283-305a		other offences against assets	5076	4934	142	0	0	0	5076	142	4934	74	400	974	1448	3486
		306-323c o. 316a		offences constituting a public danger	12112	11718	394	171	166	5	11941	389	11552	144	715	1566	2425	9127
		324-330a		offences against the environment	280	273	7	0	0	0	280	7	273	0	3	20	23	250
	traffic law			traffic offences	53011	51971	1040	4	4	0	53007	1040	51967	77	803	4518	5398	46569
	narcotics law			drug offences	145491	136872	8619	14	14	0	145477	8619	136858	208	2787	15425	18420	118438
	offences related to other German law				17493	16631	862	0	0	0	17493	862	16631	19	300	1588	1907	14724
	offences related to the law of the former German 'Democratic' Republic (GDR)				1046	1028	18	0	0	0	1046	18	1028	0	0	3	3	1025
	Data is based on publications of the German federal statistical bureau. For detailed data, please visit: https://www-genesis.destatis.de/genesis/online

## Sheet: B suicides m
		Suicides
		juvenile and adult criminal custody
		years: 2000 - 2016
		sex: male
					Age groups
	Offences				14-18	18-21	21-25	25-30	30-40	40+		all age groups
	offences against life
		murder and related offences			0	1	3	7	23	30		64
		manslaughter and related offences			1	1	2	5	7	13		29
	offences against physical integrety				2	9	13	10	34	28		96
	crimes against personal liberty				0	0	0	0	0	0		0
	offences against sexual self-determination (1)
		rape			0	2	1	0	18	11		32
		sex abuse			0	0	0	0	6	15		21
		sex assault			0	1	0	1	1	1		4
		exhibitionism			0	0	0	1	0	1		2
		pimping			0	0	0	0	1	0		1
	drug offences				1	3	8	15	13	16		56
	theft and related offences				4	15	16	11	31	18		95
	fraud and related offences				0	0	4	3	7	18		32
	Robbery and Extortion
		Robbery			0	3	4	8	11	5		31
		rapacious extortion			0	5	2	3	7	8		25
		robbery resulting in death			0	1	0	0	1	0		2
		extortion			0	0	0	1	3	1		5
		theft resembling robbery			0	0	1	1	0	1		3
	traffic offences				0	0	1	2	5	4		12
	other				0	0	1	1	3	9		14
	Sum				8	41	56	69	171	179		524
	(1) Definitions and sub-categories changes during the study period

## Sheet: C suicides f
		Suicides
		juvenile and adult criminal custody
		years: 2000 - 2016
		sex: female
					Age groups
	Offences				14-18	18-21	21-25	25-30	30-40	40+		all age groups
	offences against life
		murder and related offences			0	0	0	0	0	2		2
		manslaughter and related offences			0	0	0	0	0	2		2
	offences against physical integrety				0	0	0	0	0	0		0
	crimes against personal liberty				0	0	0	0	0	0		0
	offences against sexual self-determination
		rape			0	0	0	0	0	0		0
		sex abuse			0	0	0	0	0	0		0
		sex assault			0	0	0	0	0	0		0
		exhibitionism			0	0	0	0	0	0		0
		pimping			0	0	0	0	0	0		0
	drug offences				0	0	0	1	0	1		2
	theft and related offences				0	0	1	0	0	1		2
	fraud and related offences				0	0	0	0	1	1		2
	Robbery and Extortion
		Robbery			0	0	0	1	0	0		1
		rapacious extortion			0	1	1	0	0	0		2
		robbery resulting in death			0	0	0	0	0	0		0
		extortion			0	0	0	0	0	0		0
		theft resembling robbery			0	0	0	0	0	0		0
	traffic offences				0	0	0	0	0	0		0
	other				0	0	0	0	0	1		1
	Sum				0	1	2	2	1	8		14
	(1) Definitions and sub-categories changes during the study period

## Sheet: D suicide rates age groups m
		Suicide rates
		juvenile and adult criminal custody
		years: 2000 - 2016
		sex: male
		all offences
		age groups
		14-18	18-21	21-25	25+		sum
	Suicides	8	41	56	419		524
	Prisoners	10802	52928	126040	769814		959584
	Suicide rate	74.0604	77.4637	44.4303	54.4287		54.607
